# Supplementary material for: Oxacalix[3]arene-supported supertetrahedron
Source: Royal Society of Chemistry journal article supplement (doi:10.1039/c2cc34792j), 2012-01-01
Supplement: c2cc34792j.pdf [file c2cc34792j.pdf]

## Supplementary Information

### 1. Figure showing solvent encapsulated by four TBOC[3] molecules.

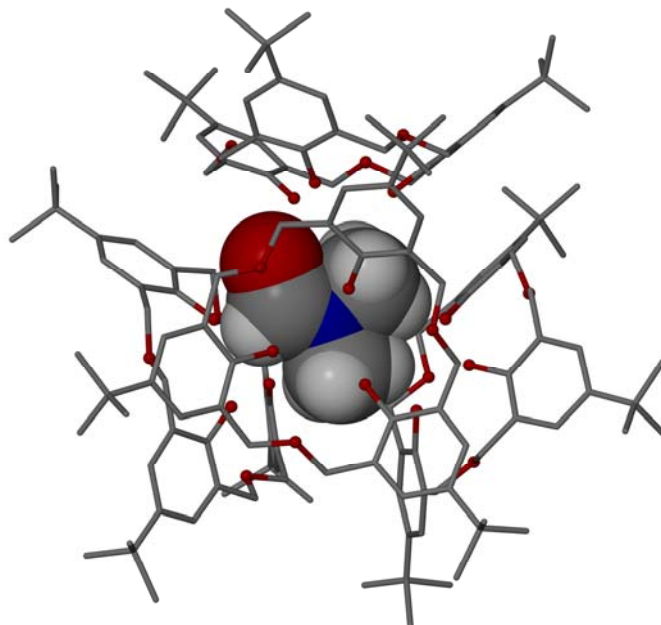

**Figure S2.** Part of the extended structure of the TBOC[3] DMF solvate showing four calixarenes packing around one DMF molecule (shown in space filling mode).

### 2. Ac susceptibility studies in the 1.8-10.0 K range in a 3.5 G field oscillating at frequencies up to 1000 Hz.

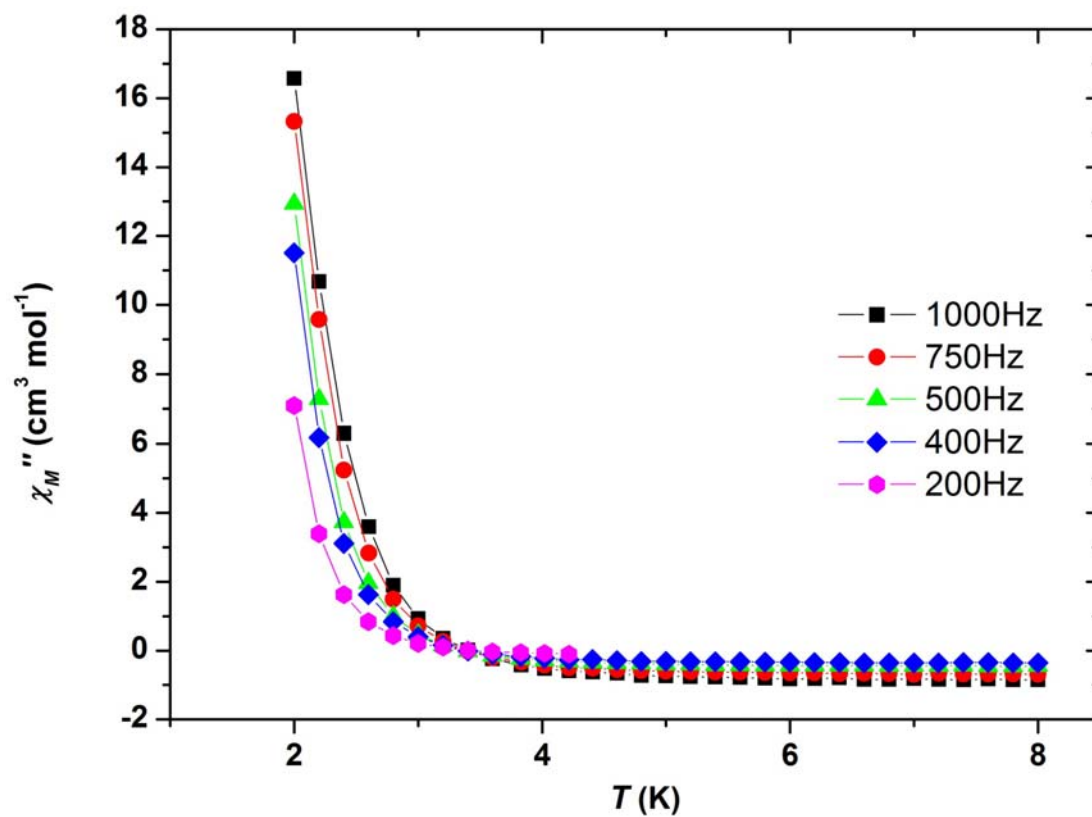

**Figure S2.** Plot of the out-of-phase ( $\chi_M''$ ) ac susceptibility versus temperature for **1** at the indicated frequencies.
